RESEARCH ARTICLE

# Human iPSC-derived myelinating organoids and globoid cells to study Krabbe disease

Lisa Marie P. Evans<sup>1</sup>, Joseph Gawron<sup>1</sup>, Fraser J. Sim<sup>2</sup>, M. Laura Feltri<sup>1,3†</sup>, Leandro N. Marziali<sup>1\*</sup>

**1** Departments of Biochemistry and Neurology, Jacobs School of Medicine and Biomedical Sciences, University at Buffalo, Buffalo, New York, United States of America, **2** Department of Pharmacology and Toxicology, Jacobs School of Medicine and Biomedical Sciences, University at Buffalo, Buffalo, New York, United States of America, **3** Biometra Department and IRCcs Carlo Besta, Università degli Studi di Milano, Milano, Italy

† Deceased.

\* [leandrom@buffalo.edu](mailto:leandrom@buffalo.edu), [marziali.l@gmail.com](mailto:marziali.l@gmail.com)

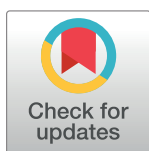

## OPEN ACCESS

**Citation:** Evans LMP, Gawron J, Sim FJ, Feltri ML, Marziali LN (2024) Human iPSC-derived myelinating organoids and globoid cells to study Krabbe disease. PLoS ONE 19(12): e0314858. <https://doi.org/10.1371/journal.pone.0314858>

**Editor:** Giovanni Signore, University of Pisa Department of Biology: Università degli Studi di Pisa Dipartimento di Biologia, ITALY

**Received:** July 24, 2024

**Accepted:** November 18, 2024

**Published:** December 5, 2024

**Copyright:** © 2024 Evans et al. This is an open access article distributed under the terms of the [Creative Commons Attribution License](https://creativecommons.org/licenses/by/4.0/), which permits unrestricted use, distribution, and reproduction in any medium, provided the original author and source are credited.

**Data Availability Statement:** All relevant data are within the paper and its [Supporting information](#) files.

**Funding:** This work partially funded by The National Institute of Neurological Disorders and Stroke (R01-NS111715-04) to MLF and (5R01NS111715-05) to FJS, and The Rosenau Family Research Foundation Research grant (1171367-1-92757) to MLF and LNM. The funders had no role in study design, data collection and

## Abstract

Krabbe disease (Kd) is a lysosomal storage disorder (LSD) caused by the deficiency of the lysosomal galactosylceramidase (GALC) which cleaves the myelin enriched lipid galactosylceramide (GalCer). Accumulated GalCer is catabolized into the cytotoxic lipid psychosine that causes myelinating cells death and demyelination which recruits microglia/macrophages that fail to digest myelin debris and become globoid cells. Here, to understand the pathological mechanisms of Kd, we used induced pluripotent stem cells (iPSCs) from Kd patients to produce myelinating organoids and microglia. We show that Kd organoids have no obvious defects in neurogenesis, astrogenesis, and oligodendrogenesis but manifest early myelination defects. Specifically, Kd organoids showed shorter but a similar number of myelin internodes than Controls at the peak of myelination and a reduced number and shorter internodes at a later time point. Interestingly, myelin is affected in the absence of autophagy and mTOR pathway dysregulation, suggesting lack of lysosomal dysfunction which makes this organoid model a very valuable tool to study the early events that drive demyelination in Kd. Kd iPSC-derived microglia show a marginal rate of globoid cell formation under normal culture conditions that is drastically increased upon GalCer feeding. Under normal culture conditions, Kd microglia show a minor LAMP1 content decrease and a slight increase in the autophagy protein LC3B. Upon GalCer feeding, Kd cells show accumulation of autophagy proteins and strong LAMP1 reduction that at a later time point are reverted showing the compensatory capabilities of globoid cells. Altogether, this supports the value of our cultures as tools to study the mechanisms that drive globoid cell formation and the compensatory mechanism in play to overcome GalCer accumulation in Kd.

## Introduction

Krabbe Disease (Kd), also known as globoid cell leukodystrophy, is a lysosomal storage disease (LSD) caused by mutations in the *GALC* gene which encodes the lysosomal hydrolase galactosyl

analysis, decision to publish, or preparation of the manuscript.

**Competing interests:** The authors have declared that no competing interests exist.

ceramidase (GALC). The incidence of Kd in USA is estimated to be 1:100,000–1:250,000 [1]. Kd is classified on the basis of the age of symptoms onset as early infantile, late infantile, juvenile and adult [2–4]. Kd patients experience rapid and severe demyelination, neurodegeneration, and neuroinflammation in the central nervous system (CNS) and peripheral nervous system (PNS). Symptoms include: progressive neurologic deterioration with decorticate posturing, blindness, deafness, peripheral neuropathy, autonomic instability, and death [3, 4].

White matter is mostly composed of axons that are ensheathed by myelin which is produced by mature oligodendrocytes (OLs) in the CNS. Myelin is a lipid-rich insulating multi-layer that protects and provides trophic support to axons, and allows rapid impulse propagation through the saltatory propagation of action potentials between Nodes of Ranvier [5]. Oligodendrocyte Progenitor Cells (OPCs) arise from neuroectoderm derived Neural Stem Cells (NSCs) which also produce neurons and astrocytes [6]. Microglia, the innate immune system surveillants of the CNS, originate from the mesoderm derived yolk sac which produces microglial progenitors capable of migrating towards and colonizing the CNS during embryonic development [7].

Animal models of Kd are available and in particular, the twitcher mouse [8], a global *GALC* knock out model, and the recently developed *GALC* conditional knock out mouse [9] together with human biopsies had been used to study the physiopathology of Kd. In Kd, the lack of GalC function or the failure to dock GalC into lysosomes [10] causes the accumulation of GalC's substrate galactosyl ceramide (GalCer) which is alternatively deacylated by the catabolic enzyme acid ceramidase (Asah1) to produce psychosine [11], a very potent toxin. The myelinating cells, OLs in the CNS and Schwann Cells (SC) in the PNS, produce large amounts of GalCer and are particularly susceptible to cell death due to the accumulated psychosine. The subsequent demyelination triggers an inflammatory response that recruits microglia/macrophages (CNS/PNS) to demyelinating foci. Microglia/macrophages phagocytize and digest GalCer rich myelin debris however, the lack of GalC causes GalCer and psychosine accumulation, and the formation of multinucleated cells named globoid cells [9].

Lysosomes are acidic organelles (pH 4.5–5) that were discovered in the 1950s and initially thought to be solely responsible for the degradation of lipids, proteins, and carbohydrates [12]. The catabolic activity of the lysosomes is carried out by luminal acid hydrolases which require the acidic conditions generated by the vacuolar-type  $H^+$  ATPase (V-ATPase) located at the lysosome's membrane [13].

Although lysosomes were historically considered cellular debris bins, they are now recognized as key contributors to cellular homeostasis through their roles in material recycling/autophagy and metabolic regulation/nutrient sensing [14].

Autophagy delivers defective organelles or proteins, and aggregates to lysosomes for degradation and includes: macroautophagy (referred to as autophagy), microautophagy and chaperone-mediated autophagy (CMA). The process includes initiation, double membrane nucleation, formation of the pre-autophagosome, elongation, and cargo selection and it is very tightly regulated by autophagy related (ATG) proteins. The early stages involve the Unc-51-like kinase 1 (ULK1) complex, the class III phosphatidylinositol 3-kinase (PIK3C3) complex, and the PI3P binding complex promoting the recruitment of the machinery needed for autophagosome assembly including the ATG12 conjugation system. Microtubule-associated protein 1 light chain 3 (LC3) is cleaved by ATG4 to form LC3-I which is conjugated to phosphatidylethanolamine (PE) to become LC3-II and incorporated into pre-autophagosomal membranes. Next, LC3-II binds to cargo receptors containing LC3-interacting motifs (LIRs) such as p62/SQSTM1 to yield fully developed autophagosomes [15].

In regards to metabolic regulation and nutrient sensing, lysosomes break down macromolecules to produce nutrients, including free amino acids, that regulate the activity of the

mechanistic target of rapamycin complex 1 (mTORC1) located at the lysosomes' membrane. In turn, mTORC1 regulates lysosomes' catabolic functions by modulating the activity of the vacuolar-type H<sup>+</sup> ATPase (V-ATPase) at the lysosomes' membranes [16]. In addition, mTORC1 regulates metabolism by promoting protein, lipid, and nucleotide synthesis through the phosphorylation of downstream targets such as Ribosomal S6 kinase (S6K) and eukaryotic initiation factor 4E-binding protein 1 (4E-BP1) while inhibiting autophagy through the phosphorylation of ULK1 and ATG13 [17]. In the context of LSDs, lysosomes accumulate toxic molecules or lose their homeostatic capabilities, leading to lysosomal dysfunction. This can result in reduced autophagic flux, evidenced by the accumulation of LC3-II and p62), and/or dysregulation of the mTOR pathway [18].

Whereas animal models of Kd give us the opportunity to study the dynamics of the cellular and molecular events that drive the disease and to test different therapeutic interventions, the study of the human disease is limited to post mortem tissue. In the past few years, the utilization of iPSCs to replicate organogenesis *in vitro* has emerged and several diseases have been successfully modeled providing the tools to perform in-detail studies of the cellular and molecular mechanisms that drive different diseases [19, 20]. Here, we show that Kd can be modeled by using myelinating organoids that show no obvious defects in neurogenesis, astrogenesis and oligodendrogenesis but signs of demyelination and iPSC-derived microglia that when fed with GalCer give rise to globoid cells.

## Materials and methods

### Ethics committee review

All iPSC lines belong to de-identified donors and all the procedures performed in the present study were reviewed by University at Buffalo Institutional Review Board (UBIRB) (STUDY00004329 and MOD00013481) that determined that the proposed activity is not research involving human subjects.

### iPSC demographics and culture

We used 4 iPSC lines including 2 Control (Ctrol) lines from apparently healthy individuals and 2 iPSC lines from early onset Kd patients. The 2 Ctrol and 1 of the Kd lines were purchased from The Coriell Institute: GM23720 iPSC from B-lymphocyte of an apparently healthy 22-year-old female, AG27875 iPSC from fibroblast of an apparently healthy 29-year-old male and GM26644 iPSC from fibroblast of a two-year-old female Kd patient homozygous for the previously characterized 30kb deletion of the *GALC* gene [21]. The second Kd line was a gift from Dr. Daesung Shin at SUNY at Buffalo: this line was an iPSC from fibroblast produced at The Induced Pluripotent Stem Cell Generation facility at SUNY at Buffalo; the originating fibroblasts were obtained from the Telethon Biobank (FFF0751981) with unknown demographics bearing compound heterozygous *GALC* mutations (30kb-del + T529M) [10, 22].

iPSCs were cultured on non-cell culture treated plates (Greiner Bio-One 657185) coated with 8.6 µg/cm<sup>2</sup> Growth Factor Reduced Matrigel (Corning 356230) and mTeSR-Plus media (STEMCELL Technologies, 05825) at 37°C/5%CO<sub>2</sub>. Upon thawing iPSCs were plated in media containing 10 µM Y27632—ROCK inhibitor (STEMCELL Technologies, 72304) for 24 hrs. Afterwards, ROCK inhibitor was removed from the media and iPSCs passed when reached 80% confluency using ReLeSR Reagent (STEMCELL Technologies, 05872).

## Myelinating organoid culture

Spinal cord patterned myelinating organoids were generated as described previously [23]. iPSC colonies were detached with 15 U/ml Dispase II (Thermo Fischer Scientific, 17105–041) in PBS for 10–15 min in the incubator. After washing with PBS, colonies were transferred into Ultra-Low Attachment 6 well plates (Corning, 3473) in media containing Phase I media: 0.5X Iscove's Modified Dulbecco's Medium (Thermo Fischer Scientific, 12440053), 0.5X Ham's F-12 Nutrient Mixture (Thermo Fischer Scientific, 11765054), 0.5% BSA, 1X Chemically Defined Lipid Concentrate (Thermo Fischer Scientific, 11905031), 0.004% (v/v) monothioglycerol (Sigma, M6145), 7 µg/ml insulin (Sigma, 11376497001), 15 µg/ml transferrin (Sigma, 10652202001), 1X Antibiotic-Antimycotic (Sigma-Aldrich, A5955), 1 mM N-acetyl cysteine (Sigma, A8199), 10 µM SB431542 (STEMCELL Technologies, 72234), 0.1 µM LDN-193189 (STEMCELL Technologies, 72147) and cultured at 37°C/5%CO<sub>2</sub>. On day 7, spheroids were moved to Phase II media: Phase I media without SB431542 and LDN-193189, and the addition of 0.1 µM retinoic acid (RA, Sigma, R2625), 5 ng/ml FGF-2 (PeproTech, AF-100-18B) and 5 ng/ml heparin (Sigma, H3149), and cultured at 37°C/5%CO<sub>2</sub>. On day 14, spheroids were plated onto 25 µg/mL poly-L-lysine/10 µg/mL laminin (Sigma, P5899 and L2020) coated plates in Phase II media and cultured at 37°C/5%CO<sub>2</sub>. On day 17, spheroids were lifted and returned to suspension culture in Phase III media: 1X Advanced DMEM/F12 (Thermo Fisher Scientific, 12491015), 0.5X N2 (Thermo Fisher Scientific, 1750200), 0.5X B27 (Thermo Fisher Scientific, 17504–044), 0.5X Glutamax (Thermo Fisher Scientific, 35050061), 1X Antibiotic-Antimycotic, 5 ng/ml FGF-2, 5 ng/ml heparin, 1 µM RA, 1 µM purmorphamine (STEMCELL Technologies, 72204), and cultured at 37°C/10%CO<sub>2</sub>. After 8 days, FGF-2 and heparin were removed from the media. After 14 days, Media was changed to oligodendrocyte proliferation media: 1X Advanced DMEM/F12, 1X N2, 0.5X B27, 1X Glutamax, 1X Antibiotic-Antimycotic, 10 ng/ml FGF-2, 20 ng/ml PDGF-AA (PeproTech, AF-100-13A), 1 µM purmorphamine, 1 µM smoothened agonist (EMD Millipore, 566660), 10 ng/ml IGF-1 (PeproTech, AF-100-11), 45 ng/ml T3 (Sigma, T6397), 5 µg/ml heparin and cultured at 37°C/7.5%CO<sub>2</sub>. After 3 weeks, spheroids were transferred to a PTFE-coated Millicell Cell Culture Inserts in 6 well plates, and maintained in myelination media: 1X Advanced DMEM/F12, 1X N2, 0.5X B27, 1X Glutamax, 1X Antibiotic-Antimycotic, 1X ITS-X (Thermo Fisher Scientific, 51500056), 10 ng/ml IGF-1, 45 ng/ml T3 and 5 µg/ml heparin and cultured at 37°C/7.5%CO<sub>2</sub>. Media was changed every 2–3 days throughout the protocol.

## Microglia culture

iPSC-derived microglia were produced as described previously [24]. iPSCs were dissociated to single cell suspension with Accutase<sup>®</sup> (Sigma, A6964) for 2–3 min. in the incubator and plated onto 8.6 µg/cm<sup>2</sup> Matrigel (Corning, 356234) coated dishes at a density of 1.5x10<sup>3</sup> cells/cm<sup>2</sup> in mTeSR-Plus media containing 10µM Rock Inhibitor for 24 hrs. After 1–2 days, when colonies became visible, media was changed to mTeSR Custom media (STEMCELL Technologies), containing 80 ng/ml BMP4 and cultured at 37°C/5%CO<sub>2</sub> with daily media changes for 4 days. Next, media was changed to StemPro-34 SFM, 1X GlutaMAX-I, 25 ng/ml FGF-2, 100 ng/ml SCF (PeproTech, 300–07) and 80 ng/ml VEGF (PeproTech, 100–20). After 2 days, media was changed to StemPro-34, 50 ng/ml SCF, 50 ng/ml IL-3 (PeproTech, 200–03), 5 ng/ml TPO (PeproTech, 300–18), 50 ng/ml M-CSF (PeproTech, 300–25) and 50 ng/ml Flt3 ligand (R&D Systems, 308-FK-100/CF). From this point onwards, cells in the supernatant were pelleted and returned to the culture with fresh media every 3–4 days. On day 14, media was changed to StemPro-34, 50 ng/ml M-CSF, 50 ng/ml Flt3 ligand and 25 ng/ml GM-CSF (PeproTech, AF-300-03). From day 25 to 45, microglia progenitors were isolated by Magnetic Cell Sorting

(MACS) with CD14 beads (Miltenyi Biotec, 130-118-906), plated onto tissue culture-treated dishes or Thermanox plastic coverslips in media containing RPMI-1640, 1X GlutaMAX-I, 10 ng/ml GM-CSF and 100 ng/ml IL-34 (PeproTech, 200–34), and cultured at 37°C/5%CO<sub>2</sub> with media changes every 2–3 days for at least 10 days.

### Myelinating organoid—Microglia co-cultures

To make myelinating organoid-microglia, these co-cultures were initially run as previously described and synchronized. Specifically, when myelinating organoids reached 60 days in culture, microglia progenitors were ready to be sorted. For engraftment of Ctrl microglia into Ctrl organoids, 25,000 freshly sorted CD14<sup>+</sup> microglial progenitors were added to each D60 organoid and cultured in the organoid's media and conditions. After 24 hrs, the media was changed, and organoids were cultured according to the previously described procedures.

### EdU incorporation

Proliferating cells were labelled with the thymidine analogue 5-ethynyl-2'-deoxyuridine (EdU) (Sigma; 900584) at a 1  $\mu$ M concentration that was added to the culture media 1 h before fixation. EdU incorporation was visualized by using click chemistry. Briefly, fixed cells were incubated for 30 min at RT with a solution containing 8  $\mu$ M Alexa Fluor 488-azide (Cedarlane; CLK-1275-1), 2 mM CuSO<sub>4</sub>·5H<sub>2</sub>O, and 20 mg/ml ascorbic acid.

### GalC activity

GalC activity was measured as previously described [25]. Briefly, proteins were extracted using a solution containing 10 mmol/L Sodium Phosphate buffer pH 6.0 and 0.1% (v/v) Nonidet NP-40 for 30 min on ice followed 3 rounds of sonication and a 10 min. centrifugation at 13,000g. Next, supernatants were collected and protein concentration measured by BCA assay (Thermo Fischer Scientific). GalC activity assays were run using 5  $\mu$ g of protein (50  $\mu$ L) that were added to a substrate mixture containing: 100  $\mu$ L of 1.5 mmol/L 4-Methylumbelliferyl- $\beta$ -D-galactopyranoside (MUGAL) substrate diluted in 0.1/0.2 mol/L citrate/phosphate buffer pH 4.0 and 15  $\mu$ M AgNO<sub>3</sub>. The reactions were run for 30 minutes at 37°C and stopped by adding 100  $\mu$ L of 0.2 mol/L Glycine/NaOH, pH 10.6. Next, fluorescence was measured using a BioTek Cytation 5 spectrofluorometer ( $\lambda_{\text{ex}}$  360 nm,  $\lambda_{\text{em}}$  446 nm) and MUGAL break down was determined by quantifying the amount of 4-Methylumbelliferone liberated utilizing a 4-Methylumbelliferone (Sigma, M1381) standard curve. Enzymatic activity was calculated as 1 unit been 1.0  $\mu$ mol/min of substrate hydrolyzed at 37°C.

### Immunohistochemistry and immunocytochemistry

For immunohistochemistry, organoids were fixed with 2% paraformaldehyde (PFA) in PBS at 4°C ON. Next, the organoids were rinsed with PBS, cryopreserved by immersion in 30% sucrose until sunk and cryosectioned with a Leica CM1850 cryostat to obtain 20  $\mu$ m thick sections. For immunocytochemistry, cells were fixed with 2% PFA at 4°C for 20 min followed by a wash with PBS. Sections or cells were blocked for 2 hrs. at RT with 5% fetal bovine serum (FBS) in PBS containing 0.2% Triton X-100. Primary antibodies (See Table 1) were incubated ON at 4°C followed by 3 washes with PBS and the corresponding secondary antibodies (1:500; Jackson ImmunoResearch Laboratories) containing 4',6-diamidino-2-phenylindol (DAPI; 1  $\mu$ g/ml) were incubated for 2 hrs. at RT. After 3 washes with PBS, sections were mounted with Eprelia™ Immu-Mount™ (Fisher Scientific) and imaged with a Zeiss Apotome microscope and analyzed using ImageJ software.



Table 1. Antibodies.

| Antibody             | Source                             | Identifier (RRID) | Application                |
|----------------------|------------------------------------|-------------------|----------------------------|
| Caspr                | Abcam ab34151                      | AB_869934         | IHC <sup>a</sup> : 1:800   |
| CD14                 | R&D Systems MAB3832                | AB_2074161        | ICC <sup>b</sup> : 1:200   |
| Cx3CR1               | R&D Systems AF5825                 | AB_2292441        | ICC: 1:100                 |
| GFAP                 | Sigma-Aldrich G9269                | AB_477035         | IHC: 1:1,000               |
| GAPDH                | Sigma-Aldrich G9545                | AB_796208         | WB <sup>c</sup> : 1:10,000 |
| Iba1                 | Wako 019-19741                     | AB_839504         | IHC/ICC: 1:1,000           |
| Islet1/2             | DSHB 39.4D5                        | AB_2314683        | IHC 1:100                  |
| Ki67                 | Cell Signaling Technology 12202    | AB_2620142        | IHC: 1:500                 |
| LAMP1                | Abcam ab24170                      | AB_775978         | WB: 1:1,000                |
| LC3B                 | Cell Signaling Technology 2775     | AB_915950         | WB: 1:1,000                |
| MBP                  | Covance SMI99P                     | AB_10120129       | 1:1,000                    |
| Nanog                | Novus NB110-40660                  | AB_715024         | ICC: 1:1,000               |
| NeuN                 | EMD Millipore MAB377               | AB_2298772        | IHC: 1:250                 |
| Nfasc                | Thermo Fisher Scientific PA5-47468 | AB_2609964        | IHC: 1:400                 |
| Neurofilament M (NF) | BioLegend 822701                   | AB_256486         | IHC: 1:1,000               |
| Nkx2.2               | DSHB 74.5A5                        | AB_531794         | IHC: 1:50                  |
| Olig2                | Proteintech 13999-1-AP             | AB_2157541        | IHC: 1:800                 |
| OCT4                 | Proteintech 11263-1-AP             | AB_2167545        | ICC: 1:500                 |
| p62                  | Cell Signaling Technology 5114     | AB_10624872       | WB: 1:1,000                |
| S6 (phosphorylated)  | Cell Signaling Technology 4858     | AB_916156         | WB: 1:1,000                |
| S6 (total)           | Cell Signaling Technology 2217     | AB_331355         | WB: 1:1,000                |
| Sox2                 | Cell Signaling Technology 3579     | AB_2195767        | IHC: 1:500                 |
| TRA1-60              | Abcam ab16288                      | AB_778563         | ICC: 1:500                 |

<sup>a</sup>IHC: immunohistochemistry<sup>b</sup>ICC: immunocytochemistry<sup>c</sup>WB: western blot
<https://doi.org/10.1371/journal.pone.0314858.t001>

For myelin labelling, non-sectioned whole organoids were stained. After fixation and cryo-preservation, organoids were blocked with 5% FBS in PBS containing 1% Triton X-100 for 24 hrs. at 4°C. Primary antibodies (See Table 1) were diluted in 2% FBS in PBS 1% Triton X-100 and incubated for 24 hrs. at 4°C followed by 4 washes (30 min each) with PBS. The corresponding secondary antibodies (1:500; Jackson ImmunoResearch Laboratories) were diluted in 2% FBS in PBS 1% Triton X-100 containing DAPI (1 µg/ml) and incubated for 24 hrs. at 4°C. After 4 washes (30 min each) with PBS, organoids were individually placed in 96 well glass bottomed plates (Corning, 4580) containing PBS and imaged using a Leica DMI6000 CS confocal microscope. Stacks were processed using ImageJ's plug in Simple Neurite Tracer's (SNT) to count the number and measure length of myelin internodes [26].

## Immunoblotting

Total proteins were extracted using RIPA buffer supplemented with protease and phosphatase inhibitors. Proteins (1–2 µg) were loaded into NuPage™ 4–12% Bis Tris Protein Gels, 1.0 mm, 17 wells or in house made 4–12% Bis-Tris, 1.0 mm, 21 wells and run using MES buffer. Transfer onto polyvinylidene difluoride (PVDF) membranes was done using BioRad's Trans-Blot Turbo Transfer System. The membranes were blocked with 5% Bovine Serum Albumin (BSA) in TBS containing 0.2% Tween 20 for 2 hrs. at RT. Primary antibodies (See Table 1) were diluted in blocking solution and incubated ON at 4°C. The corresponding peroxidase-

conjugated secondary antibodies were diluted in blocking solution and incubated for 2 hrs. at RT. The blots were developed by using ECL Select Western Blotting Detection Reagent (Cytiva's Amersham) and a ChemiDoc XRS+ system (Bio-Rad).

### GalCer feeding

Mature microglia were exposed to 10  $\mu$ M GalCer (C8 Galactosyl( $\beta$ ) Ceramide (d18:1/8:0)) (Avanti Polar Lipids, 860538P) for 16, 24 or 48 hrs. GalCer was resuspended at 20 mM concentration in DMSO, stored in a N<sub>2</sub> inert atmosphere and used no more than 2 times. To facilitate GalCer incorporation, the lipid carrier (2-Hydroxypropyl)- $\beta$ -cyclodextrin (Sigma, 778966) was used at a 0.1 mM final concentration.

### Electron microscopy

Organoids were fixed with 2.5% glutaraldehyde/4% PFA in 0.12 M phosphate buffer (pH 7.4) for at least 24 hrs. at 4°C. Next, the samples were stained with 1% osmium tetroxide for 2 hrs. at RT, dehydrated, and embedded into epoxy resin (Sigma-Aldrich; 45359-1EA-F). Ultrathin (90 nm) sections were obtained with a Leica EM UC7 ultramicrotome. Ultrathin sections were stained with uranyl acetate and lead citrate and imaged with an FEI Tecnai G2 Spirit BioTwin transmission electron microscope.

### Statistical analysis

Measurements belonging to individual Ctrl or Kd lines were grouped and colour coded to reflect that each value represents a replicate of an individual culture/organoid. Each experiment was repeated at least 2 times. GraphPad Prism 9.1.1 software was used to perform two-tailed Student's *t* tests to compare two groups/time points and two-way ANOVAs followed by multiple-comparisons post-tests to compare more than two groups and time points. Statistical significance was set at a *P* value of <0.05.

## Results

### Kd iPSCs do not show any morphological and proliferation defects

To model Kd in vitro for the study of the pathological mechanisms of Kd, we used iPSCs derived from Kd dermal fibroblasts. We first confirmed that Kd iPSCs have a significant reduction in GalC activity when compared to Ctrl ones (Fig 1A). Next, we observed that Kd iPSCs form normally appearing compact colonies with well-defined borders, no morphological signs of differentiation and express the pluripotency factors Nanog, TRA1-60 and OCT4 similarly to Ctrl (Fig 1B). Finally, Kd iPSCs show no difference in their proliferation rate when compared to Ctrl ones as shown by EdU pulse (Fig 1C).

### Kd organoids develop normally and show no defects in neurogenesis, astrogenesis, and oligodendrogenesis

To study neurodevelopment and myelination in Kd, we used a previously described protocol to make iPSC-derived myelinating organoids that recapitulate spinal cord development (Fig 2A) [23]. Under these culture conditions, iPSCs first give rise to neuroectoderm (D7-20) followed by neurogenesis (D37), astrogenesis (D37), oligodendrogenesis (D37-60) and later on, myelination (myelination weeks 0–28 counting from D60). At a glance, Kd organoids show no macroscopic differences after 60 days in culture when compared to Ctrl (Fig 2B). Next, we analyzed the NSC population by Sox2 staining and found no differences between Ctrl and Kd organoids at D20 (Fig 2C). At D37 there is no difference in the number of

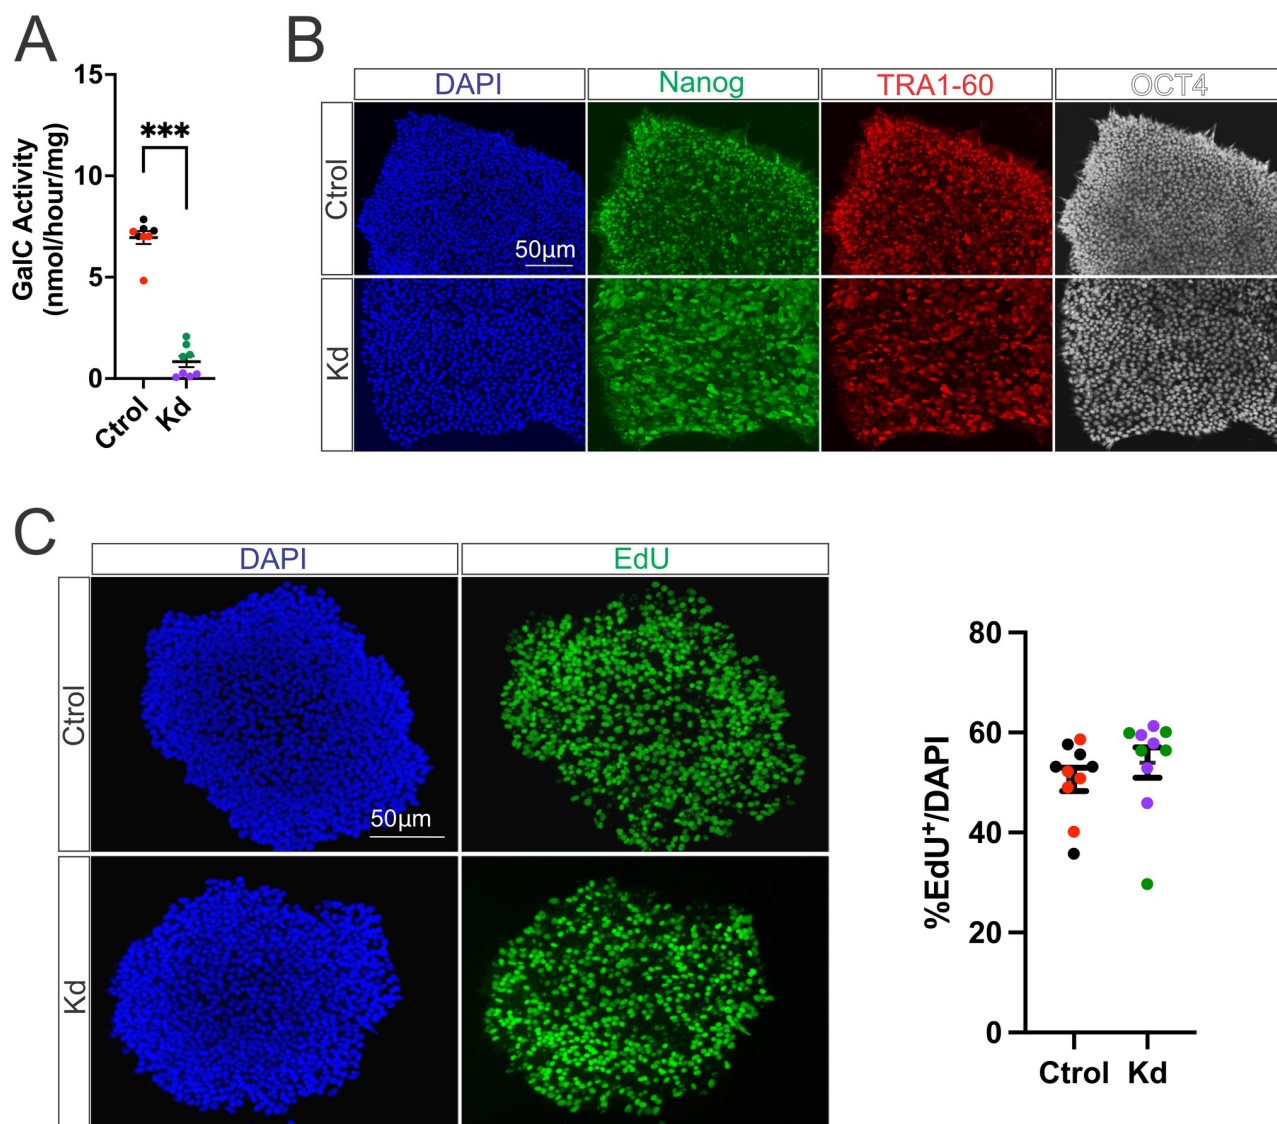

**Fig 1. Kd iPSCs do not show any morphological and proliferation defects.** (A) GALC activity measurements of Ctrl and Kd iPSCs. (B) Immunohistochemistry of Ctrl and Kd iPSCs for the pluripotency markers Nanog, TRA1-60 and OCT4. (C) Proliferation assessment by EdU incorporation assay of Ctrl and Kd iPSCs. Colors indicate replicates from individual iPSC lines. Values are expressed as the means  $\pm$  SEMs. \*\*\* $P < 0.001$  by Student's  $t$  test.

<https://doi.org/10.1371/journal.pone.0314858.g001>

proliferating Ki67<sup>+</sup> cells (Fig 2D) supporting the idea that Kd organoids develop similarly to Ctrl. In regards to neurogenesis, we found no differences between groups in the number of NeuN<sup>+</sup> neurons and Islet-1/2<sup>+</sup> neuronal progenitors at D37 (Fig 2E and 2F). Astrogenesis was similar between groups as shown by GFAP content at D37 (Fig 2G). In regards to oligodendrogenesis, we analyzed 2 time points: D37 and D60, the first one representing endogenous oligodendrogenesis and the second one oligodendrogenesis driven by the exposure of the cultures to the oligodendrocyte specific growth factors PDGF-AA and FGF-2. In both cases, we found no differences in the number of Olig2<sup>+</sup>/Nkx2.2<sup>+</sup> OPCs between groups (Fig 2H).



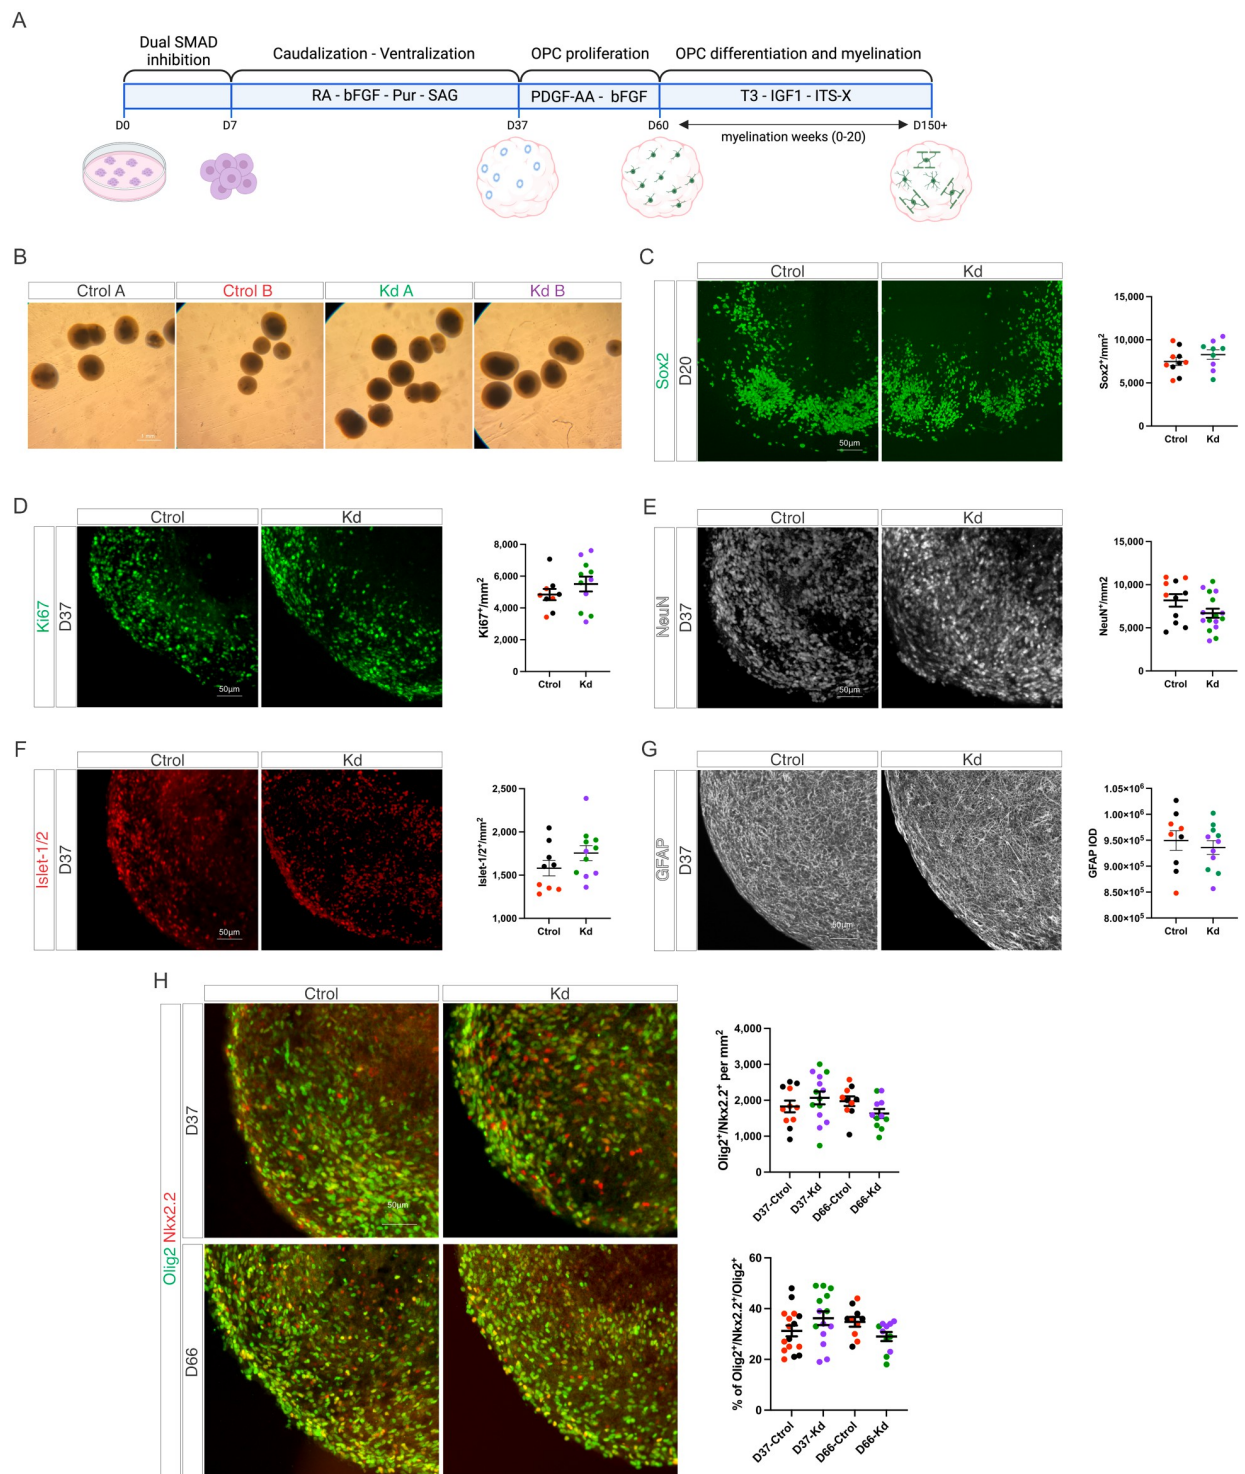

**Fig 2. Kd organoids show normal neurogenesis, astrogenesis and oligodendrogenesis.** (A) Graphical abstract of the protocol used to produce myelinating organoids. (B) Brightfield images of Ctrl and Kd organoids at D60 of culture. (C) Immunohistochemistry and quantifications of the number of Sox2<sup>+</sup> neural stem cells in Ctrl and Kd organoids at D20. (D) Immunohistochemistry and quantifications of the number of Ki67<sup>+</sup> proliferating progenitors in Ctrl and Kd organoids at D37. (E) Immunohistochemistry and quantifications of the number of NeuN<sup>+</sup> pan-neuronal marker in Ctrl and Kd organoids at D37. (F) Immunohistochemistry and quantifications of the number of Islet1/2<sup>+</sup> neuronal progenitors in Ctrl and Kd organoids at D37. (G) Immunohistochemistry and densitometric quantifications of GFAP<sup>+</sup> astrocytes in Ctrl and Kd organoids at D37. (H) Immunohistochemistry and quantifications of the number of Olig2<sup>+</sup>/Nkx2.2<sup>+</sup> OPCs in Ctrl and Kd organoids at D37 and D60. Values are expressed as the number of Olig2<sup>+</sup>/Nkx2.2<sup>+</sup> per area (upper chart) or the number of Olig2<sup>+</sup>/Nkx2.2<sup>+</sup> relative to the Olig2<sup>+</sup> population (lower chart). Colors indicate replicates from individual iPSC lines. Values are expressed as the means  $\pm$  SEMs.

<https://doi.org/10.1371/journal.pone.0314858.g002>

## Kd organoids show signs of demyelination and minimal mTOR pathway perturbation

To analyze if GALC deficiency affects myelination extent, we cultured organoids in oligodendrocyte differentiation/myelinating media for up to 28 weeks after the oligodendrocyte proliferation phase (D60) and counted the number of MBP<sup>+</sup> myelin internodes and internode's length. Ctrl organoids show early signs of myelination after the 8<sup>th</sup> week of exposure to myelination media and with fully established myelin and Nodes of Ranvier, labelled by node's proteins Nfasc and Caspr, after 12 weeks in this media (Fig 3A). After 12 weeks of myelination, Ctrl and Kd organoids show a similar number of MBP<sup>+</sup> internodes, although a small decrease was observed in Kd organoids that show shorter internodes when compared to Ctrl ones (Fig 3B). Next, we cultured the organoids for another 8 weeks in myelination media (20 wk myelination) and found that Kd organoids have a decreased number of MBP<sup>+</sup> internodes with persistent shorter internodes (Fig 3B). Interestingly, Ctrl organoids also show a trend decrease in the number of MBP<sup>+</sup> internodes between weeks 12 and 20 of myelination, indicating that the culture conditions might have a limitation in maintaining myelin for long periods of time. To further explore this and to test if the decrease in the number of MBP<sup>+</sup> internodes observed in Kd organoids becomes a stronger phenotype, we cultured Ctrl and Kd organoids for an additional 8 weeks in myelinating media (28 wk myelination) and found that both Ctrl and Kd organoids show extensive loss of myelin and a strong reduction in the number of Olig2<sup>+</sup> oligodendrocytes S1 Fig. Ultrastructural EM analysis shows that Kd organoids have signs of lysosomal enlargement, vacuolation, lipid droplet (Fig 3C—upper panel) and myelin debris accumulation when compared to Ctrl counterparts (Fig 3C—lower panel). Altogether, our findings show that the demyelinating phenotype observed in Kd can be replicated using iPSC-derived organoids *in vitro*.

Kd is an LSD caused by the deficiency of GalC and as such, lysosomal dysfunction is expected to lead to defects in macromolecule's recycling and metabolism. Our previous findings showed that an early myelination defect followed by myelin loss is present in Kd organoids starting at 12 weeks of myelination suggesting that perturbations in the above-mentioned processes might be present at 12 weeks of myelination or earlier. To evaluate this, we analyzed the content of the lysosomal marker LAMP1, the phosphorylation state of the ribosomal protein S6 [27, 28] and the autophagy markers p62 and LC3B [29–31]. Western blot analysis of organoid lysates at 8 and 12 weeks of myelination show no differences in the content of LAMP1, p62 and LC3B, and a minor increase in the phosphorylation state of S6 at both time points (Fig 3D) indicating that the mentioned perturbations might be a late event in our model and not the cause for myelin loss.

At this point we were able to establish that Kd organoids lacking microglia/macrophages show an intrinsic, inflammation-independent, demyelinating phenotype that resembles the one observed in patients and animal models however, globoid cells are pathognomonic in Kd and because of this, we decided to co-culture our organoids with microglial progenitors. We obtained microglial progenitors by using a previously described protocol [24] S2A Fig. After CD14 MACS we obtained pure Cx3CR1<sup>+</sup>/CD14<sup>+</sup> microglia progenitors (D35) that differentiate into Iba1<sup>+</sup> mature microglia after 15 days *in vitro* (D50) S2B Fig. Next, we added Cx3CR1<sup>+</sup>/CD14<sup>+</sup> microglial progenitors to D60 organoids, changed them into myelinating media and checked for the presence of microglia for an additional 3, 6 or 9 weeks (D60 + 3wk/6wk/9wk). At D60 + 3wk a significant number of Iba1<sup>+</sup> microglia are present in organoids and show reactive morphology but at later time points, we observed a strong reduction in the number of Iba1<sup>+</sup> microglia S2C Fig. similar to what has been recently reported [32], indicating a limitation of globoid cells *in vitro*.

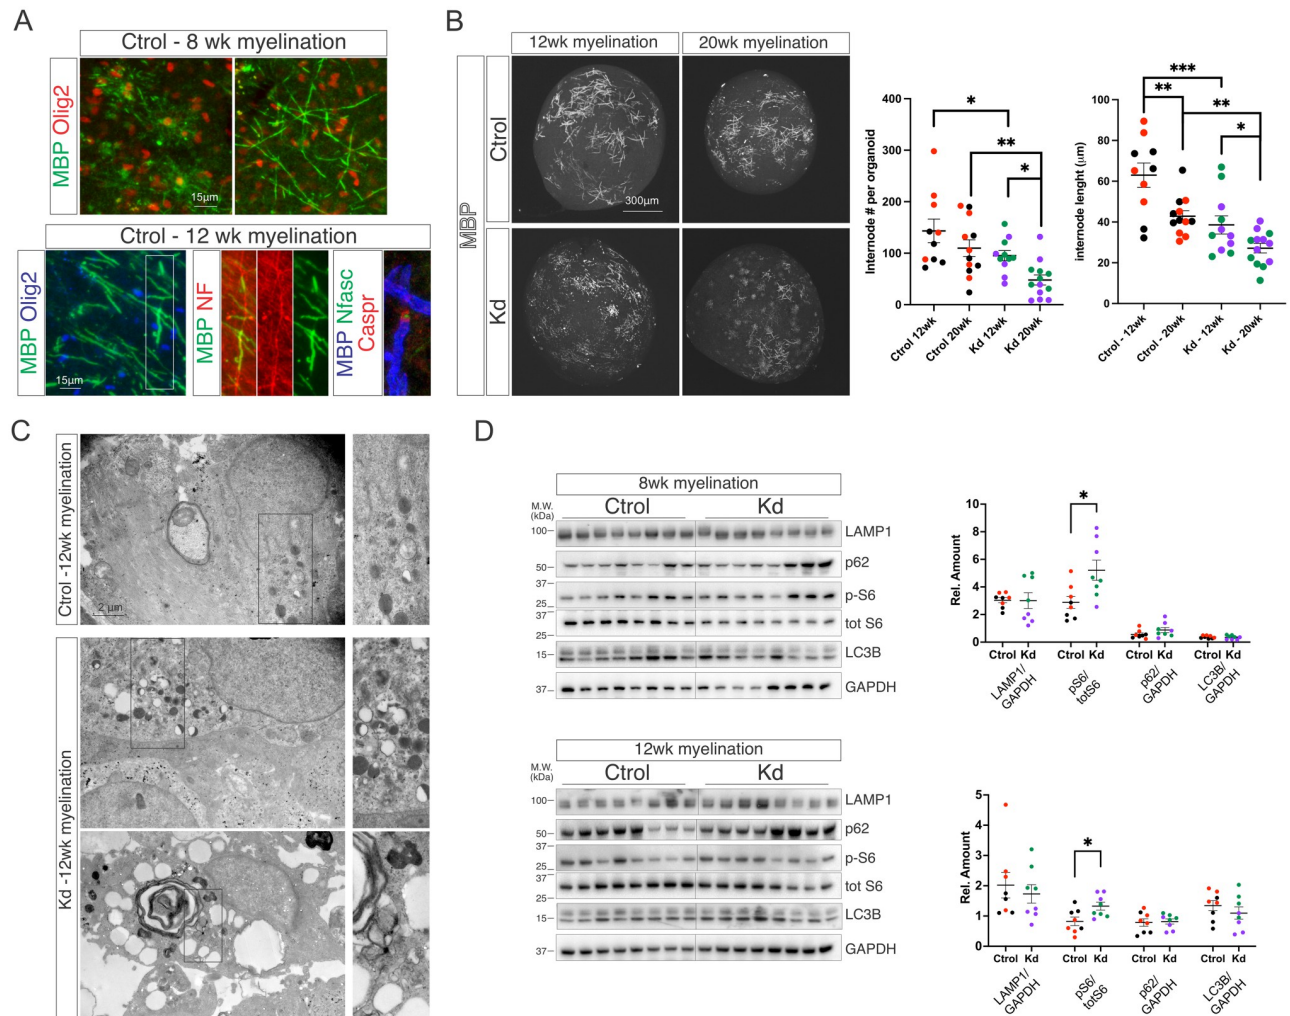

**Fig 3. Kd organoids signs of demyelination and minimal mTOR pathway perturbation.** (A) Immunohistochemistry for MBP<sup>+</sup>/Olig2<sup>+</sup> mature oligodendrocytes at 8 or 12 weeks of myelination. Immunohistochemistry at 12 weeks for MBP/NF myelinated axons and MBP/Nfasc/Caspr fully developed nodes of Ranvier. (B) Immunohistochemistry for MBP in Ctrl and Kd organoids at 12 and 20 weeks of myelination. Quantifications of the number and length of MBP<sup>+</sup> myelin internodes in Ctrl and Kd organoids at 12 and 20 weeks of myelination. Each point in the internode's length graph represents the average internode's length per organoid. (C) Electron micrographs of Ctrl and Kd organoids at 12 weeks of myelination showing lysosomal enlargement, vacuolation, lipid droplets and myelin debris in Kd organoids. (D) Western blot of Ctrl and Kd organoid's lysates at 8 and 12 weeks of myelination for the lysosomal marker LAMP1, the ribosomal protein S6 (S6) and the autophagy proteins p62 and LC3B. Colors indicate replicates from individual iPSC lines. Values are expressed as the means  $\pm$  SEMs. \* $P$  < 0.05, \*\* $P$  < 0.01, and \*\*\* $P$  < 0.001 by Student's  $t$  test or two-way ANOVA followed by Newman-Keuls multiple-comparisons post-test.

<https://doi.org/10.1371/journal.pone.0314858.g003>

## Globoid cell formation is drastically increased in Kd microglia by GalCer feeding

Globoid cells are prominently found in Kd tissues and suggested to be a key player in Kd's progression [33]. To test if the GALC deficient microglia can become globoid cells, we isolated Ctrl and Kd microglial progenitors, allowed them to differentiate into mature microglia, fed them with media containing GalCer or vehicle and counted the number of globoid-shaped cells labeled with Phalloidin. Kd microglia fed with vehicle show a minor but significant increase in the number globoid shaped cells (rounded and multinucleated cells) when compared to Ctrl ones however, a very drastic increase in this phenomenon is observed when Kd



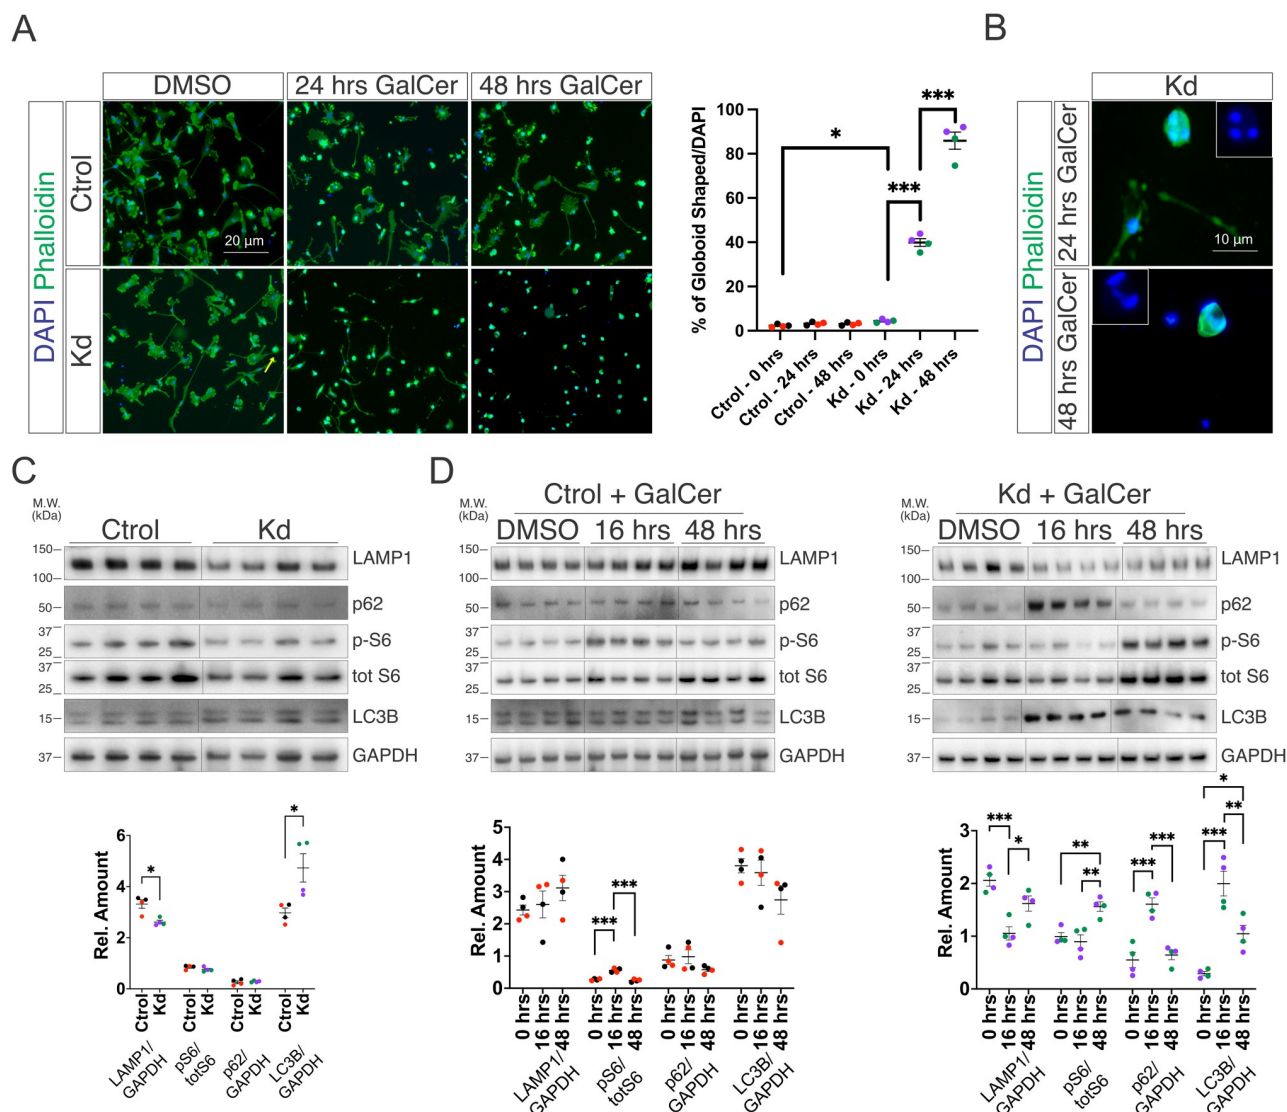

**Fig 4. Globoid cell formation is drastically increased in Kd microglia by GalCer feeding.** (A) Differentiated microglia (D50) from Ctrl and Kd iPSCs treated with vehicle (DMSO + HMCD) or 10  $\mu$ M GalCer for 24 or 48 hrs. Phalloidin's staining of actin to identify cell morphology. Quantification of the number of globoid shaped cells. Arrow indicates globoid cell in Kd cultures fed with DMSO. (B) Phalloidin staining for globoid multinucleated cells in Kd cultures exposed to GalCer for 24 or 48 hrs. (C) Western blot analysis of untreated Ctrl and Kd microglia for the lysosomal marker LAMP1, the ribosomal protein S6 (S6) and the autophagy proteins p62 and LC3B. (D) Western blot analysis of Ctrl (left) and Kd (right) microglia exposed to GalCer for 16 or 48 hrs. for the lysosomal marker LAMP1, the ribosomal protein S6 (S6) and the autophagy proteins p62 and LC3B. Colors indicate replicates from individual iPSC lines. Values are expressed as the means  $\pm$  SEMs. \* $P$  < 0.05, \*\* $P$  < 0.01, and \*\*\* $P$  < 0.001 by Student's  $t$  test.

<https://doi.org/10.1371/journal.pone.0314858.g004>

microglia are fed with GalCer for 24 or 48 hrs. (Fig 4A). A hallmark of globoid cells is their multinucleation, which is present in Kd cells after 24 hrs. of GalCer feeding and persisted after 48 hrs. of culture under these conditions (Fig 4B). Next, hypothesized that globoid cells are very likely to experience lysosomal dysfunction and this will manifest as defects in macromolecule's recycling and cellular metabolism. To explore this idea, we analyzed the content of the lysosomal marker LAMP1, the phosphorylation state of the ribosomal protein S6 and the autophagy markers p62 and LC3B. First, we analyzed vehicle-fed Ctrl and Kd cells and found

that the last ones have a slight decrease in LAMP1 content and a slight increase in LC3B content (Fig 4C). Next, we analyzed the effect of GalCer feeding at an early (16 hrs.) and a late time point (48 hrs.) and our findings show that Ctr0l cells show minimal perturbation as reflected by a minor and transient increase in S6 phosphorylation state whereas Kd cells show drastic p62 and LC3B accumulation, reduction in LAMP1 content and a late increase in S6 phosphorylation (Fig 4D). All these suggest that initially, GalCer overload in Kd is detrimental to lysosomes but later on, globoid cells put in play compensatory mechanisms to increase the number of lysosomes and reduce the accumulation of phagocytic proteins.

## Discussion

Currently, Kd patients receive supportive care and the only approved disease-modifying treatment is hematopoietic stem cell transplantation (HSCT) which is effective in asymptomatic patients [34, 35]. Despite the immense success of HSCT in decreasing Kd's progression, patients who receive HSCT experience variable levels of disability that are extensive in symptomatic patients [36, 37]. In line with this, efforts have been made to explore additional treatments including substrate reduction therapy (SRT) (blocking catabolic pathways to prevent GalCer accumulation), enzyme replacement therapy (ERT) (administration of recombinant GalC) or gene therapy (viral delivery of GalC's construct) [38]. Among the single treatments, adeno-associated virus (AAV) delivery of GalC's construct shows the best outcomes in disease progression and survival of pre-symptomatic mice and dogs [39, 40]. In addition, gene therapy combined with HSCT, shows superior disease outcomes in pre-symptomatic mice [40, 41]. Currently, there are two ongoing gene therapy-based clinical trials (NCT05739643 and NCT04693598) (<https://clinicaltrials.gov/>). In addition, combining three different treatments including HSCT, gene therapy and SRT given to pre-symptomatic mice showed even better disease outcomes than dual HSCT/gene therapy treatment [42], but despite increasing the survival of the animals by 10-fold, motor dysfunction measured by rotarod and wire hanging tests, persists similarly to what happens in patients that received HSCT [36, 37] ultimately highlighting the importance of the need for a better understanding of the mechanisms that drive demyelination, neurodegeneration and neuroinflammation.

To identify the molecular mechanisms that underlay Kd pathology, iPSCs and iPSC-derived cultures were used. Lv and colleagues [43] performed bulk RNA sequencing of Kd iPSCs and NSC and found early dysregulated genes in Kd iPSCs and a significantly larger number of dysregulated genes in Kd NSC. Pathway analysis shows the involvement of novel pathways in Kd iPSCs, and the dysregulation of the MAPK, PI3K-Akt, cAMP, and RAS signaling pathways, as well as neuroactive ligand-receptor in Kd NSC. Interestingly, neither Kd iPSCs nor NSCs show dysregulation of the Kd associated Lysosome or Sphingolipid Metabolism KEGG pathways supporting the idea that the findings by Lv and colleagues are novel early events in Kd. Another work differentiated Kd iPSCs into astrocytes that show no gross development defects, accumulate psychosine, have increased expression and levels of IL-6, and a lipid accumulation phenotype [44]. Interestingly, Kd astrocytes negatively impact the survival of Ctr0l neurons (both in a co-culture setting or by adding astrocyte conditioned media) but positively impact Ctr0l microglia survival in co-culture. Mangiameli and colleagues [45] studied Kd patient-derived iPSCs and found that they retain normal stem cell properties, despite of accumulating psychosine, and show similar differentiation efficiency and comparable phenotype to Ctr0l ones when differentiated into NSC. When Kd iPSCs were differentiated into neuronal/glial mixed cultures, the oligodendroglial and neuronal populations were negatively impacted. This phenomenon is explained by the activation of an early senescence program that affects lineage commitment, and an altered lipidomic profile throughout the iPSC to NSC stage. Altogether,



these studies show that Kd impacts neurodevelopment in iPSC-derived 2D cultures but none of them explored myelination, which is largely impacted in Kd. In line with this, we used a 3D culture method that produces robust myelination [23] among the several approaches to induce iPSC differentiation into oligodendrocyte and myelination [46] and were able to replicate, for the first time, the demyelinating phenotype observed in Kd using iPSC-derived cultures.

A major strength of using iPSC-derived cultures to model human disease is the opportunity to study human genetic variants associated with a specific disease. However, experimental variability can arise from differences in the reprogramming or differentiation protocols used [47]. In this regard, transcriptomic analyses from large stem cell repositories showed that variability is mostly caused by genetic differences between individuals [48], rather than by technical replicates, although the latter still contribute. While we successfully modelled Kd in myelinating organoids that show the demyelinating phenotype and Kd iPSC-derived microglia that become globoid cells, we understand that comparisons between isogenic lines would strengthen our findings, and this remains a limitation of our study.

Axonopathy in the spinal cord of pre-symptomatic Twitcher and Twitcher5J mice has been described before any detectable demyelination occurs suggesting a neuronal cell-autonomous phenotype [49, 50]. Interestingly, these findings do not manifest as a reduction in the number of NeuN<sup>+</sup> cells until the later stages of the disease. In support of a neuronal cell-autonomous mechanism of GALC ablation, early neuronal maturation defects together with a reduced number of Sox2<sup>+</sup>/Olig2<sup>+</sup> OPCs have been shown to occur in the brain stem of GALC null mice [51] and a follow up study using pan-neuronal GALC deficient mice showed morphological signs of neurodegeneration in the spinal cord of 6 month old animals confirming a neuronal cell-autonomous phenotype in Kd [52]. Because of all of these, we can expect that our Kd organoids are very likely to experience some extent of axonopathy, that is not detectable by NeuN staining during the early stages of the cultures but could be detected at later stages, and to not show any neurogenesis defects because of recapitulating spinal cord development instead of brain stem's. In this context, the results reported by Mangiameli and colleagues [45] showing neurodevelopmental defects, but not found in our study, could be caused by the limitations of 2D as compared to 3D cultures [53], the use of a protocol that yields a modest number of astrocytes and oligodendrocytes (limiting potential compensatory mechanisms arising from these cell populations) or because of recapitulating forebrain development whereas our protocol recapitulates spinal cord development, shows abundant number of both cell populations and replicates the findings described in mice.

In Kd, lysosomes fail to degrade GalCer resulting in the production and accumulation of psychosine which ultimately leads to lysosomal dysfunction [54]. Lysosomes have multiple roles in several cellular processes including material recycling, metabolic signaling, autophagy, gene regulation, plasma membrane repair, and cell adhesion and migration [14]. In line with this, Kd phenotype has been linked to: metabolic dysregulation as shown by mTOR pathway dysregulation [27, 28] and autophagy impairment [27, 29–31]. Interestingly, our Kd organoids show signs of demyelination in the absence of any major autophagy dysregulation and the presence of a minor mTOR pathway dysregulation suggesting the absence of lysosomal dysfunction. Because of these, our Kd organoids are a valuable method to study the early events that drive demyelination in Kd in the absence of neuroinflammation, overcoming the limitations of using human biopsies. In regards to globoid cells. Kd microglia that weren't fed with GalCer show small signs of what could be lysosomal impairment when compared to Ctrl microglia however, overloading microglia (both Ctrl and Kd) with GalCer shows an interesting phenomenon. In Ctrl microglia fed with GalCer, lysosomes can handle the overload as shown by the lack of accumulation of autophagic proteins and a modest mTOR pathway hyperactivation at an early time point. Later on, a trend decrease in autophagic proteins

together with an increased lysosomal biogenesis, suggested by a trend increase of LAMP1 content, is observed and we interpreted this as normal compensation to lysosome's overload. In the case of Kd microglia fed with GalCer, a strong accumulation of autophagic proteins and reduction of LAMP1 is observed at an early time point but at later on, when most cells had become globoid cells, a similar compensatory mechanism takes place by increasing LAMP1 content, reducing autophagic proteins and increasing mTOR pathway activation. Altogether this suggests that Kd lysosomes could be damaged at early time points, but replaced later on, showing that globoid cells possess the capacity to promote lysosome biogenesis in an attempt to restore autophagic flow which could be explored in the future using our model of globoid cells.

Globoid cells are pathognomonic of Kd, show a storage phenotype, are PAS<sup>+</sup>, have a distended cytoplasm with enlarged lysosomes, lipid crystals (presumably GalCer), and partially digested myelin sheaths [55, 56]. In regards to how globoid cells form, macrophages/microglia fed with psychosine [57, 58] or GalCer [9] give rise to globoid cells. However, GalCer feeding induces globoid cells only in GALC deficient macrophages causing accumulation of both psychosine and GalCer whereas psychosine feeding induces globoid phenotype in wild type cell (wt) cultures. This indicates that psychosine is the driving force of globoid cell formation however, wt macrophages fed with GalCer (that do not become globoid cells) are very likely to resemble the foamy phagocytic cells observed in mice that received HSCT [59]. These cells are a relevant cell population for treatment purposes like boosting the phagocytic capabilities of donor macrophages in LSDs [9, 60]. In this context, our model of globoid cells will allow us to study both globoid cells (Kd + GalCer) and overloaded donor-like cells (Ctrl + GalCer), in order to get a better understanding of the mechanisms that drive globoid cell formation and to identify novel mechanisms to promote donor cell's beneficial effects.

## Supporting information

**S1 Fig. Both Ctrl and Kd organoids show strong myelin disruption at 28 weeks of myelination.** Immunohistochemistry for MBP and Olig2 of Ctrl and Kd Organoids at 28 weeks of myelination.

(TIF)

**S2 Fig. Microglial progenitors engraft organoids but do not survive beyond 6 weeks of co-culture.** (A) Graphical abstract of the protocol used to produce iPSC derived microglia. (B) Immunohistochemistry for Cx3R1<sup>+</sup>/CD14<sup>+</sup> microglial progenitors immediately after isolation (D35) and Iba1<sup>+</sup> microglia after 14 days of differentiation (D50). (C) Microglial progenitors' (D35) engraftment into D60 organoids. Immunohistochemistry for Iba1<sup>+</sup> microglia engrafted into organoids 3, 6 and 9 weeks after engraftment.

(TIF)

**S1 Raw data.**

(XLS)

**S1 Raw image.**

(PDF)

## Acknowledgments

We would like to specially thank Dr. Daesung Shin for critical reading of the manuscript and all the members of our laboratory for constructive discussions. Also, we will like thank The Rosenau Family Foundation (formerly The Legacy of Angels Foundation) for their support.

MLF passed away before the submission of the final version of this manuscript. LNM accepts responsibility for the integrity and validity of the data collected and analyzed.

## Author Contributions

**Conceptualization:** M. Laura Feltri, Leandro N. Marziali.

**Data curation:** Lisa Marie P. Evans, Leandro N. Marziali.

**Formal analysis:** Lisa Marie P. Evans, Leandro N. Marziali.

**Funding acquisition:** M. Laura Feltri, Leandro N. Marziali.

**Investigation:** Lisa Marie P. Evans, Joseph Gawron, Leandro N. Marziali.

**Methodology:** Lisa Marie P. Evans, Joseph Gawron, Leandro N. Marziali.

**Project administration:** Fraser J. Sim, M. Laura Feltri, Leandro N. Marziali.

**Supervision:** Leandro N. Marziali.

**Writing – original draft:** Leandro N. Marziali.

**Writing – review & editing:** Lisa Marie P. Evans, Fraser J. Sim, Leandro N. Marziali.

## References

1. Barczykowski AL, Foss AH, Duffner PK, Yan L, Carter RL. Death rates in the U.S. due to Krabbe disease and related leukodystrophy and lysosomal storage diseases. *Am J Med Genet A*. 2012; 158A(11):2835–42. <https://doi.org/10.1002/ajmg.a.35624> PMID: 22991292
2. Bascou N, DeRenzo A, Poe MD, Escolar ML. A prospective natural history study of Krabbe disease in a patient cohort with onset between 6 months and 3 years of life. *Orphanet J Rare Dis*. 2018; 13(1):126.
3. Duffner PK, Barczykowski A, Jalal K, Yan L, Kay DM, Carter RL. Early infantile Krabbe disease: results of the World-Wide Krabbe Registry. *Pediatr Neurol*. 2011; 45(3):141–8. <https://doi.org/10.1016/j.pediatrneurol.2011.05.007> PMID: 21824559
4. Duffner PK, Barczykowski A, Kay DM, Jalal K, Yan L, Abdelhalim A, et al. Later onset phenotypes of Krabbe disease: results of the world-wide registry. *Pediatr Neurol*. 2012; 46(5):298–306. <https://doi.org/10.1016/j.pediatrneurol.2012.02.023> PMID: 22520351
5. Simons M, Gibson EM, Nave KA. Oligodendrocytes: Myelination, Plasticity, and Axonal Support. *Cold Spring Harb Perspect Biol*. 2024. <https://doi.org/10.1101/cshperspect.a041359> PMID: 38621824
6. El Waly B, Macchi M, Cayre M, Durbec P. Oligodendrogenesis in the normal and pathological central nervous system. *Front Neurosci*. 2014; 8:145. <https://doi.org/10.3389/fnins.2014.00145> PMID: 24971048
7. Sierra A, Miron VE, Paolicelli RC, Ransohoff RM. Microglia in Health and Diseases: Integrative Hubs of the Central Nervous System (CNS). *Cold Spring Harb Perspect Biol*. 2024. <https://doi.org/10.1101/cshperspect.a041366> PMID: 38438189
8. Kobayashi T, Yamanaka T, Jacobs JM, Teixeira F, Suzuki K. The Twitcher mouse: an enzymatically authentic model of human globoid cell leukodystrophy (Krabbe disease). *Brain Res*. 1980; 202(2):479–83. [https://doi.org/10.1016/0006-8993\(80\)90159-6](https://doi.org/10.1016/0006-8993(80)90159-6) PMID: 7437911
9. Weinstock NI, Shin D, Dhimal N, Hong X, Irons EE, Silvestri NJ, et al. Macrophages Expressing GALC Improve Peripheral Krabbe Disease by a Mechanism Independent of Cross-Correction. *Neuron*. 2020; 107(1):65–81.e9. <https://doi.org/10.1016/j.neuron.2020.03.031> PMID: 32375064
10. Shin D, Feltri ML, Wrabetz L. Altered Trafficking and Processing of GALC Mutants Correlates with Globoid Cell Leukodystrophy Severity. *J Neurosci*. 2016; 36(6):1858–70. <https://doi.org/10.1523/JNEUROSCI.3095-15.2016> PMID: 26865610
11. Li Y, Xu Y, Benitez BA, Nagree MS, Dearborn JT, Jiang X, et al. Genetic ablation of acid ceramidase in Krabbe disease confirms the psychosine hypothesis and identifies a new therapeutic target. *Proc Natl Acad Sci U S A*. 2019; 116(40):20097–103. <https://doi.org/10.1073/pnas.1912108116> PMID: 31527255
12. De Duve C, Pressman BC, Gianetto R, Wattiaux R, Appelmans F. Tissue fractionation studies. 6. Intracellular distribution patterns of enzymes in rat-liver tissue. *Biochem J*. 1955; 60(4):604–17. <https://doi.org/10.1042/bj0600604> PMID: 13249955

13. Trivedi PC, Bartlett JJ, Pulinilkunnil T. Lysosomal Biology and Function: Modern View of Cellular Debris Bin. *Cells*. 2020; 9(5). <https://doi.org/10.3390/cells9051131> PMID: 32375321
14. Ballabio A, Bonifacino JS. Lysosomes as dynamic regulators of cell and organismal homeostasis. *Nat Rev Mol Cell Biol*. 2020; 21(2):101–18. <https://doi.org/10.1038/s41580-019-0185-4> PMID: 31768005
15. Aman Y, Schmauck-Medina T, Hansen M, Morimoto RI, Simon AK, Bjedov I, et al. Autophagy in healthy aging and disease. *Nat Aging*. 2021; 1(8):634–50. <https://doi.org/10.1038/s43587-021-00098-4> PMID: 34901876
16. Ratto E, Chowdhury SR, Siefert NS, Schneider M, Wittmann M, Helm D, et al. Direct control of lysosomal catabolic activity by mTORC1 through regulation of V-ATPase assembly. *Nat Commun*. 2022; 13(1):4848. <https://doi.org/10.1038/s41467-022-32515-6> PMID: 35977928
17. Napolitano G, Di Malta C, Ballabio A. Non-canonical mTORC1 signaling at the lysosome. *Trends Cell Biol*. 2022; 32(11):920–31. <https://doi.org/10.1016/j.tcb.2022.04.012> PMID: 35654731
18. Uribe-Carretero E, Rey V, Fuentes JM, Tamargo-Gomez I. Lysosomal Dysfunction: Connecting the Dots in the Landscape of Human Diseases. *Biology (Basel)*. 2024; 13(1). <https://doi.org/10.3390/biology13010034> PMID: 38248465
19. Eichmüller OL, Knoblich JA. Human cerebral organoids—a new tool for clinical neurology research. *Nat Rev Neurol*. 2022; 18(11):661–80. <https://doi.org/10.1038/s41582-022-00723-9> PMID: 36253568
20. Adlakha YK. Human 3D brain organoids: steering the demolecularization of brain and neurological diseases. *Cell Death Discov*. 2023; 9(1):221. <https://doi.org/10.1038/s41420-023-01523-w> PMID: 37400464
21. Luzi P, Rafi MA, Wenger DA. Characterization of the large deletion in the GALC gene found in patients with Krabbe disease. *Hum Mol Genet*. 1995; 4(12):2335–8. <https://doi.org/10.1093/hmg/4.12.2335> PMID: 8634707
22. Rafi MA, Luzi P, Chen YQ, Wenger DA. A large deletion together with a point mutation in the GALC gene is a common mutant allele in patients with infantile Krabbe disease. *Hum Mol Genet*. 1995; 4(8):1285–9. <https://doi.org/10.1093/hmg/4.8.1285> PMID: 7581365
23. James OG, Selvaraj BT, Magnani D, Burr K, Connick P, Barton SK, et al. iPSC-derived myelinoids to study myelin biology of humans. *Dev Cell*. 2021; 56(9):1346–58.e6. <https://doi.org/10.1016/j.devcel.2021.04.006> PMID: 33945785
24. Douvaras P, Sun B, Wang M, Kruglikov I, Lallós G, Zimmer M, et al. Directed Differentiation of Human Pluripotent Stem Cells to Microglia. *Stem Cell Reports*. 2017; 8(6):1516–24. <https://doi.org/10.1016/j.stemcr.2017.04.023> PMID: 28528700
25. Martino S, Tiribuzi R, Tortori A, Conti D, Visigalli I, Lattanzi A, et al. Specific determination of beta-galactocerebrosidase activity via competitive inhibition of beta-galactosidase. *Clin Chem*. 2009; 55(3):541–8. <https://doi.org/10.1373/clinchem.2008.115873> PMID: 19147730
26. Arshadi C, Gunther U, Eddison M, Harrington KIS, Ferreira TA. SNT: a unifying toolbox for quantification of neuronal anatomy. *Nat Methods*. 2021; 18(4):374–7. <https://doi.org/10.1038/s41592-021-01105-7> PMID: 33795878
27. Lin DS, Huang YW, Lee TH, Chang L, Huang ZD, Wu TY, et al. Rapamycin Alleviates Protein Aggregates, Reduces Neuroinflammation, and Rescues Demyelination in Globoid Cell Leukodystrophy. *Cells*. 2023; 12(7). <https://doi.org/10.3390/cells12070993> PMID: 37048066
28. Inamura N, Kito M, Go S, Kishi S, Hosokawa M, Asai K, et al. Developmental defects and aberrant accumulation of endogenous psychosine in oligodendrocytes in a murine model of Krabbe disease. *Neurobiol Dis*. 2018; 120:51–62. <https://doi.org/10.1016/j.nbd.2018.08.023> PMID: 30176352
29. Del Grosso A, Angella L, Tonazzini I, Moscardini A, Giordano N, Caleo M, et al. Dysregulated autophagy as a new aspect of the molecular pathogenesis of Krabbe disease. *Neurobiol Dis*. 2019; 129:195–207. <https://doi.org/10.1016/j.nbd.2019.05.011> PMID: 31108173
30. Del Grosso A, Antonini S, Angella L, Tonazzini I, Signore G, Cecchini M. Lithium improves cell viability in psychosine-treated MO3.13 human oligodendrocyte cell line via autophagy activation. *J Neurosci Res*. 2016; 94(11):1246–60. <https://doi.org/10.1002/jnr.23910> PMID: 27638607
31. Papini N, Todisco R, Giussani P, Dei Cas M, Paroni R, Giallanza C, et al. Impaired Autophagy in Krabbe Disease: The Role of BCL2 and Beclin-1 Phosphorylation. *Int J Mol Sci*. 2023; 24(6). <https://doi.org/10.3390/ijms24065984> PMID: 36983059
32. Schafer ST, Mansour AA, Schlachetzki JCM, Pena M, Ghassemzadeh S, Mitchell L, et al. An in vivo neuroimmune organoid model to study human microglia phenotypes. *Cell*. 2023; 186(10):2111–26.e20.
33. Favret J, Nawaz MH, Patel M, Khaledi H, Gelb M, Shin D. Perinatal loss of galactosylceramidase in both oligodendrocytes and microglia is crucial for the pathogenesis of Krabbe disease in mice. *Mol Ther*. 2024; 32(7):2207–22. <https://doi.org/10.1016/j.ymthe.2024.05.019> PMID: 38734898

34. Escolar ML, Poe MD, Provenzale JM, Richards KC, Allison J, Wood S, et al. Transplantation of umbilical-cord blood in babies with infantile Krabbe's disease. *N Engl J Med*. 2005; 352(20):2069–81. <https://doi.org/10.1056/NEJMoa042604> PMID: 15901860
35. Krivit W, Shapiro EG, Peters C, Wagner JE, Cornu G, Kurtzberg J, et al. Hematopoietic stem-cell transplantation in globoid-cell leukodystrophy. *N Engl J Med*. 1998; 338(16):1119–26. <https://doi.org/10.1056/NEJM199804163381605> PMID: 9545360
36. Yoon IC, Bascou NA, Poe MD, Szabolcs P, Escolar ML. Long-term neurodevelopmental outcomes of hematopoietic stem cell transplantation for late-infantile Krabbe disease. *Blood*. 2021; 137(13):1719–30. <https://doi.org/10.1182/blood.2020005477> PMID: 33150395
37. Wright MD, Poe MD, DeRenzo A, Haldal S, Escolar ML. Developmental outcomes of cord blood transplantation for Krabbe disease: A 15-year study. *Neurology*. 2017; 89(13):1365–72. <https://doi.org/10.1212/WNL.0000000000004418> PMID: 28855403
38. Heller G, Bradbury AM, Sands MS, Bongarzone ER. Preclinical studies in Krabbe disease: A model for the investigation of novel combination therapies for lysosomal storage diseases. *Mol Ther*. 2023; 31(1):7–23. <https://doi.org/10.1016/j.ymthe.2022.09.017> PMID: 36196048
39. Hordeaux J, Jeffrey BA, Jian J, Choudhury GR, Michalson K, Mitchell TW, et al. Efficacy and Safety of a Krabbe Disease Gene Therapy. *Hum Gene Ther*. 2022; 33(9–10):499–517. <https://doi.org/10.1089/hum.2021.245> PMID: 35333110
40. Rafi MA, Luzi P, Wenger DA. Can early treatment of twitcher mice with high dose AAVrh10-GALC eliminate the need for BMT? *Bioimpacts*. 2021; 11(2):135–46. <https://doi.org/10.34172/bi.2021.21> PMID: 33842284
41. Rafi MA, Rao HZ, Luzi P, Wenger DA. Long-term Improvements in Lifespan and Pathology in CNS and PNS After BMT Plus One Intravenous Injection of AAVrh10-GALC in Twitcher Mice. *Mol Ther*. 2015; 23(11):1681–90. <https://doi.org/10.1038/mt.2015.145> PMID: 26329589
42. Li Y, Miller CA, Shea LK, Jiang X, Guzman MA, Chandler RJ, et al. Enhanced Efficacy and Increased Long-Term Toxicity of CNS-Directed, AAV-Based Combination Therapy for Krabbe Disease. *Mol Ther*. 2021; 29(2):691–701. <https://doi.org/10.1016/j.ymthe.2020.12.031> PMID: 33388420
43. Lv Y, Qin Y, Wang J, Tian G, Wang W, Cao C, et al. Identifying altered developmental pathways in human globoid cell leukodystrophy iPSCs-derived NSCs using transcriptome profiling. *BMC Genomics*. 2023; 24(1):210. <https://doi.org/10.1186/s12864-023-09285-6> PMID: 37076788
44. Lieberman R, Cortes LK, Gao G, Park H, Wang B, Jones PL, et al. Human iPSC-derived astrocytes generated from donors with globoid cell leukodystrophy display phenotypes associated with disease. *PLoS One*. 2022; 17(8):e0271360. <https://doi.org/10.1371/journal.pone.0271360> PMID: 35921286
45. Mangiameli E, Cecchele A, Morena F, Sanvito F, Matafora V, Cattaneo A, et al. Human iPSC-based neurodevelopmental models of globoid cell leukodystrophy uncover patient- and cell type-specific disease phenotypes. *Stem Cell Reports*. 2021; 16(6):1478–95. <https://doi.org/10.1016/j.stemcr.2021.04.011> PMID: 33989519
46. Shim G, Romero-Morales AI, Sripathy SR, Maher BJ. Utilizing hiPSC-derived oligodendrocytes to study myelin pathophysiology in neuropsychiatric and neurodegenerative disorders. *Front Cell Neurosci*. 2023; 17:1322813. <https://doi.org/10.3389/fncel.2023.1322813> PMID: 38273973
47. McTague A, Rossignoli G, Ferrini A, Barral S, Kurian MA. Genome Editing in iPSC-Based Neural Systems: From Disease Models to Future Therapeutic Strategies. *Front Genome Ed*. 2021; 3:630600. <https://doi.org/10.3389/fgeed.2021.630600> PMID: 34713254
48. Germain PL, Testa G. Taming Human Genetic Variability: Transcriptomic Meta-Analysis Guides the Experimental Design and Interpretation of iPSC-Based Disease Modeling. *Stem Cell Reports*. 2017; 8(6):1784–96. <https://doi.org/10.1016/j.stemcr.2017.05.012> PMID: 28591656
49. Castelvetti LC, Givogri MI, Zhu H, Smith B, Lopez-Rosas A, Qiu X, et al. Axonopathy is a compounding factor in the pathogenesis of Krabbe disease. *Acta Neuropathol*. 2011; 122(1):35–48. <https://doi.org/10.1007/s00401-011-0814-2> PMID: 21373782
50. Potter GB, Santos M, Davisson MT, Rowitch DH, Marks DL, Bongarzone ER, et al. Missense mutation in mouse GALC mimics human gene defect and offers new insights into Krabbe disease. *Hum Mol Genet*. 2013; 22(17):3397–414. <https://doi.org/10.1093/hmg/ddt190> PMID: 23620143
51. Weinstock NI, Kreher C, Favret J, Nguyen D, Bongarzone ER, Wrabetz L, et al. Brainstem development requires galactosylceramidase and is critical for pathogenesis in a model of Krabbe disease. *Nat Commun*. 2020; 11(1):5356. <https://doi.org/10.1038/s41467-020-19179-w> PMID: 33097716
52. Kreher C, Favret J, Weinstock NI, Maulik M, Hong X, Gelb MH, et al. Neuron-specific ablation of the Krabbe disease gene galactosylceramidase in mice results in neurodegeneration. *PLoS Biol*. 2022; 20(7):e3001661. <https://doi.org/10.1371/journal.pbio.3001661> PMID: 35789331



53. Jensen C, Teng Y. Is It Time to Start Transitioning From 2D to 3D Cell Culture? *Front Mol Biosci*. 2020; 7:33. <https://doi.org/10.3389/fmolb.2020.00033> PMID: 32211418
54. Folts CJ, Scott-Hewitt N, Proschel C, Mayer-Proschel M, Noble M. Lysosomal Re-acidification Prevents Lysosphingolipid-Induced Lysosomal Impairment and Cellular Toxicity. *PLoS Biol*. 2016; 14(12): e1002583. <https://doi.org/10.1371/journal.pbio.1002583> PMID: 27977664
55. Nelson E, Aurebeck G, Osterberg K, Berry J, Jabbour JT, Bornhofen J. Ultrastructural and Chemical Studies on Krabbe's Disease. *J Neuropathol Exp Neurol*. 1963; 22:414–34. <https://doi.org/10.1097/00005072-196307000-00004> PMID: 14045001
56. Norman RM, Oppenheimer DR, Tingey AH. Histological and chemical findings in Krabbe's leucodystrophy. *J Neurol Neurosurg Psychiatry*. 1961; 24(3):223–32. <https://doi.org/10.1136/jnnp.24.3.223> PMID: 13729573
57. Ijichi K, Brown GD, Moore CS, Lee JP, Winokur PN, Pagarigan R, et al. MMP-3 mediates psychosine-induced globoid cell formation: implications for leukodystrophy pathology. *Glia*. 2013; 61(5):765–77. <https://doi.org/10.1002/glia.22471> PMID: 23404611
58. Claycomb KI, Johnson KM, Bongarzone ER, Crocker SJ. An in vitro model for the study of cellular pathophysiology in globoid cell leukodystrophy. *J Vis Exp*. 2014(92):e51903. <https://doi.org/10.3791/51903> PMID: 25350151
59. Hoogerbrugge PM, Suzuki K, Suzuki K, Poorthuis BJ, Kobayashi T, Wagemaker G, et al. Donor-derived cells in the central nervous system of twitcher mice after bone marrow transplantation. *Science*. 1988; 239(4843):1035–8. <https://doi.org/10.1126/science.3278379> PMID: 3278379
60. Wolf NI, Breur M, Plug B, Beerepoot S, Westerveld ASR, van Rappard DF, et al. Metachromatic leukodystrophy and transplantation: remyelination, no cross-correction. *Ann Clin Transl Neurol*. 2020; 7(2):169–80. <https://doi.org/10.1002/acn3.50975> PMID: 31967741
